# Supplementary material for: Unique N doped Sn3O4 nanosheets as an efficient and stable photocatalyst for hydrogen generation under sunlight
Source: Royal Society of Chemistry journal article supplement (doi:10.1039/c9nr10439a), 2020-01-01
Supplement: c9nr10439a1.pdf [file c9nr10439a1.pdf]

## Electronic supplementary information (ESI)

### Unique N doped Sn<sub>3</sub>O<sub>4</sub> nanosheets as an efficient stable photocatalyst for hydrogen generation under sunlight.

Sagar Balgude<sup>ab</sup>, Yogesh Sethi<sup>a</sup>, Aarti Gaikwad<sup>c</sup>, Bharat Kale<sup>a\*</sup>, Dinesh Amalnerkar<sup>d</sup>, Parag Adhyapak<sup>a\*</sup>

<sup>a</sup>Centre for Materials for Electronics Technology, Panchawati, Pashan Road, Pune-411008, India.

<sup>b</sup>D. Y. Patil College of Engineering, Ambi, Pune-410507, India.

<sup>c</sup>CSIR- National Chemical Laboratory, Pune-411008, India.

<sup>d</sup>Institute of Nano Science & Technology, Hanyang University, Seoul-04763, South Korea.

\* Corresponding Author: Dr. P. V. Adhyapak Email: [adhyapak@cmet.gov.in](mailto:adhyapak@cmet.gov.in), [adhyapak@yahoo.com](mailto:adhyapak@yahoo.com),  
Dr. Bharat B. Kale Email: [bbkale@cmet.gov.in](mailto:bbkale@cmet.gov.in).

Table A1: Experimental details

| Sr. No. | Tin precursor (Purity 99%) | Tin precursor conc. | Urea (Purity 99%) conc. | Hydro-thermal treatment time/ temp. | Yield (%) | Morphology observed                                                                      |
|---------|----------------------------|---------------------|-------------------------|-------------------------------------|-----------|------------------------------------------------------------------------------------------|
| 01      | Stannous oxalate           | 0.34 mol            | 0.0000 mol              | 180°C/ 24 h                         | 86.23     | layered structure                                                                        |
| 02      | Stannous oxalate           | 0.34 mol            | 0.0034 mol              | 180°C/ 24 h                         | 84.33     | irregular shaped premature partial nanosheet-like                                        |
| 03      | Stannous oxalate           | 0.34 mol            | 0.0068 mol              | 180°C/ 24 h                         | 88.46     | mixed morphology i. e. Irregular shaped nanosheets and deposition of nanoparticles on it |
| 04      | Stannous oxalate           | 0.34mol             | 0.0102 mol              | 180°C/ 24 h                         | 85.78     | Utmost sheet-like                                                                        |
| 05      | Stannous oxalate           | 0.34 mol            | 0.0136 mol              | 180°C/ 24 h                         | 86.65     | nanosheet-like                                                                           |
| 06      | Stannous oxalate           | 0.34 mol            | 0.0170 mol              | 180°C/ 24 h                         | 84.47     | aggregated nanosheets                                                                    |

Table A2. Comparison of elemental analysis of 4% N doped Sn<sub>3</sub>O<sub>4</sub>.

| Elements | XPS             | EDS             |
|----------|-----------------|-----------------|
|          | Atomic weight % | Atomic weight % |
| Sn       | 60.08           | 66.47           |
| N        | 3.4             | 3.36            |
| O        | 36.52           | 30.17           |

### Supporting SI1: Raman Spectra

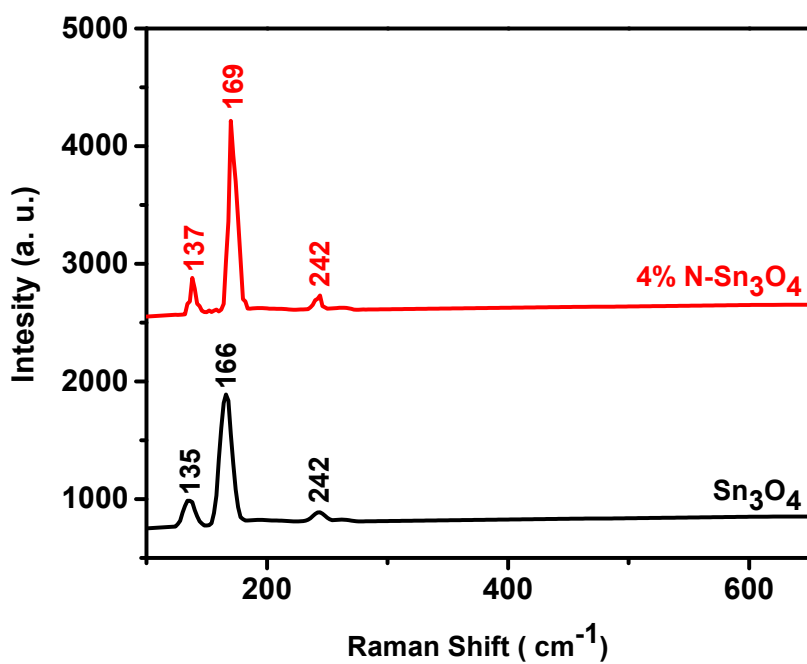

Figure SI 1 Raman Spectra of pristine (S1) and 4% N doped Sn<sub>3</sub>O<sub>4</sub> (S5).

## Supporting SI 2: Photoresponse study

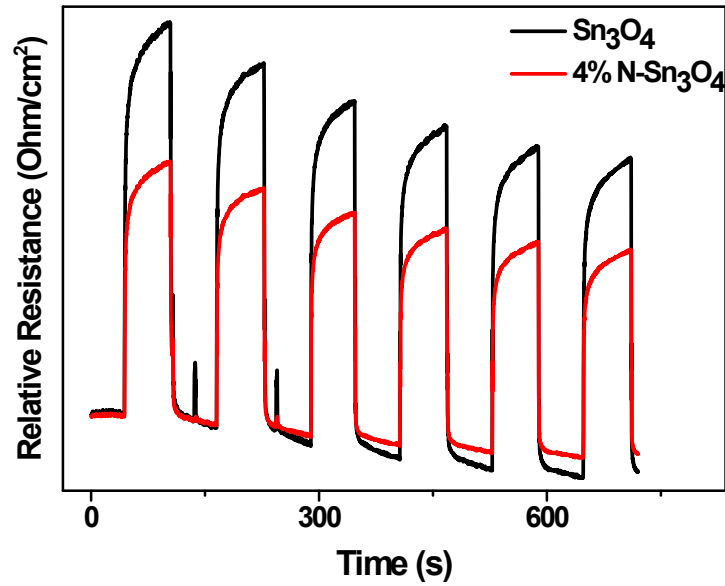

Figure SI 2 Photo response of Sn<sub>3</sub>O<sub>4</sub> and 4% N-Sn<sub>3</sub>O<sub>4</sub> under sunlight.

## Supporting SI 3: Comparison with artificial light as source

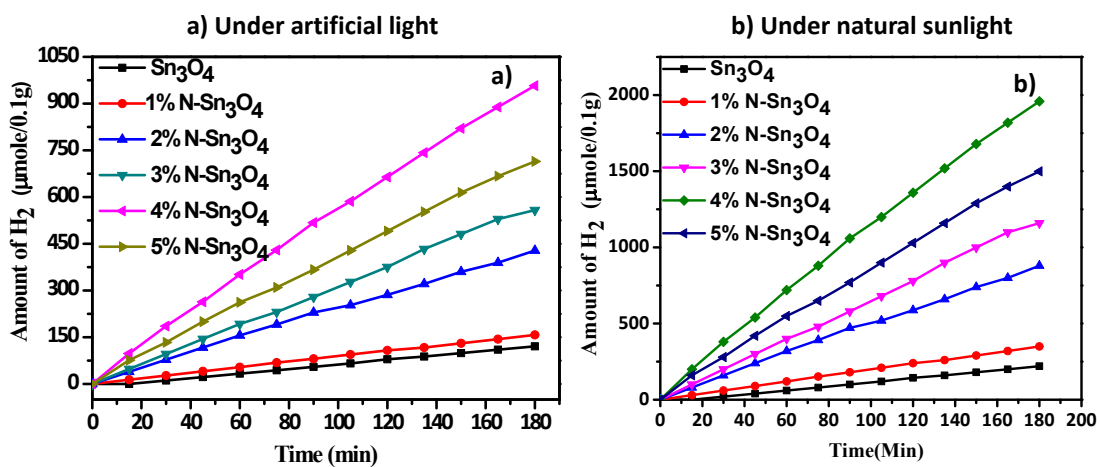

Figure SI 3 Hydrogen production as a function of irradiation time using undoped and N doped Sn<sub>3</sub>O<sub>4</sub> sample under a) artificial light b) natural sunlight.

The photocatalytic activity of the as-synthesized samples (S1-S6) for hydrogen evolution via  $\text{H}_2\text{O}$  splitting was performed. Cumulative  $\text{H}_2$  production using undoped and N doped  $\text{Sn}_3\text{O}_4$  sample under artificial and natural sunlight is shown in figure SI3. This study was performed in the presence of a co-catalyst and sacrificial agent. The volume of  $\text{H}_2$  generated was observed by gas chromatograph (GC) with respect to time. Pure  $\text{Sn}_3\text{O}_4$  shows less activity under a xenon lamp since UV radiation is eliminated. The  $\text{Sn}_3\text{O}_4$  shows  $79.41 \mu\text{mol}^{-1}\text{h}^{-1}0.1\text{g}^{-1}$  hydrogen production under natural sunlight because of availability of both UV and visible light. Amongst all catalysts, 4% N- $\text{Sn}_3\text{O}_4$ (S5) showed the highest rate for  $\text{H}_2$  generation under xenon and natural sunlight i.e.,  $542.44$  and  $654.33 \mu\text{mol}^{-1}\text{h}^{-1}0.1\text{g}^{-1}$ , respectively. S2, S3, S4, and S6 show  $\text{H}_2$  generation of  $86.25$ ,  $237.18$ ,  $307.12$ , and  $401.02 \mu\text{mol}^{-1}\text{h}^{-1}0.1\text{g}^{-1}$ , under the xenon lamp and  $122.86$ ,  $318.10$ ,  $404.24$  and  $562.43 \mu\text{mol}^{-1}\text{h}^{-1}0.1\text{g}^{-1}$ , under natural sunlight, respectively. Table A1 lists results of  $\text{H}_2$  generation in  $\mu\text{mol}^{-1}\text{h}^{-1}0.1\text{g}^{-1}$  under xenon and natural sunlight.

#### Supporting SI 4: Effect of Pt loading

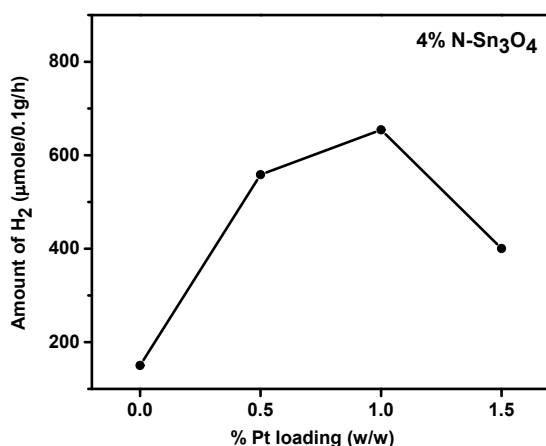

Figure SI 4 Effect of Pt loading on photocatalytic  $\text{H}_2$  evolution under sunlight.

Table A3. Photocatalytic hydrogen evolution in  $\mu\text{mol}^{-1}\text{h}^{-1}\cdot 0.1\text{g}^{-1}$

| Photocatalyst                            | Band gap Energy (eV) | Under Xenon lamp H <sub>2</sub> ( $\mu\text{mol}/\text{h}/0.1\text{g}$ ) | Under Natural sunlight H <sub>2</sub> ( $\mu\text{mol}/\text{h}/0.1\text{g}$ ) |
|------------------------------------------|----------------------|--------------------------------------------------------------------------|--------------------------------------------------------------------------------|
| 0% N-Sn <sub>3</sub> O <sub>4</sub> (S1) | 2.83                 | 66.14                                                                    | 79.41                                                                          |
| 1% N-Sn <sub>3</sub> O <sub>4</sub> (S2) | 2.69                 | 86.25                                                                    | 122.86                                                                         |
| 2% N-Sn <sub>3</sub> O <sub>4</sub> (S3) | 2.57                 | 237.18                                                                   | 318.10                                                                         |
| 3% N-Sn <sub>3</sub> O <sub>4</sub> (S4) | 2.53                 | 307.12                                                                   | 404.24                                                                         |
| 4% N-Sn <sub>3</sub> O <sub>4</sub> (S5) | 2.36                 | 542.44                                                                   | 654.33                                                                         |
| 5% N-Sn <sub>3</sub> O <sub>4</sub> (S6) | 2.45                 | 401.02                                                                   | 562.43                                                                         |

Table A4. Summary of recent research reports to photocatalytic hydrogen evolution via. H<sub>2</sub>O splitting.

| Sr. No | Photocatalyst material                             | Light source used | Hydrogen evolution ( $\mu\text{mol}/\text{h}$ ) | References                   |
|--------|----------------------------------------------------|-------------------|-------------------------------------------------|------------------------------|
| 01     | N doped Sn <sub>3</sub> O <sub>4</sub>             | 300W Xe lamp      | 542.44 $\mu\text{mol h}^{-1} 0.1\text{g}^{-1}$  | <i>Current work</i>          |
| 02     | Sn <sub>3</sub> O <sub>4</sub> /TiO <sub>2</sub>   | 300 W Xe arc lamp | 83.5 $\mu\text{mol h}^{-1} 0.2\text{g}^{-1}$    | <i>Chen et al [26]</i>       |
| 03     | Sn <sub>3</sub> O <sub>4</sub> /N-TiO <sub>2</sub> | 300 W Xe lamp     | 32 $\mu\text{mol h}^{-1} 0.1\text{g}^{-1}$      | <i>Xin Yu et al [25]</i>     |
| 04     | Sn <sub>3</sub> O <sub>4</sub>                     | 300 W Xe arc lamp | 40 $\mu\text{mol h}^{-1} 0.3\text{g}^{-1}$      | <i>Manikandan et al [29]</i> |
